# Supplementary material for: Bimetallic zeolite-imidazole framework-based heterostructure with enhanced photocatalytic hydrogen production activity
Source: Royal Society of Chemistry journal article supplement (doi:10.1039/d1ra00781e), 2021-01-01
Supplement: d1ra00781e1.pdf [file d1ra00781e1.pdf]

## Supporting Information

### **Bimetallic Zeolite-imidazole framework-based heterostructure with enhanced photocatalytic hydrogen production activity**

**Nayab Arif, Ye-Zhan Lin, Kai Wang, Yi-Chuan Dou, Yu Zhang, Kui Li, \* Shiquan Liu\***

**and Fu-Tian Liu**

School of Materials Science and Engineering, University of Jinan, Jinan 250022,  
China.

Email: mse\_lik@ujn.edu.cn; vctrliu@hotmail.com

## 4. Supporting Figures

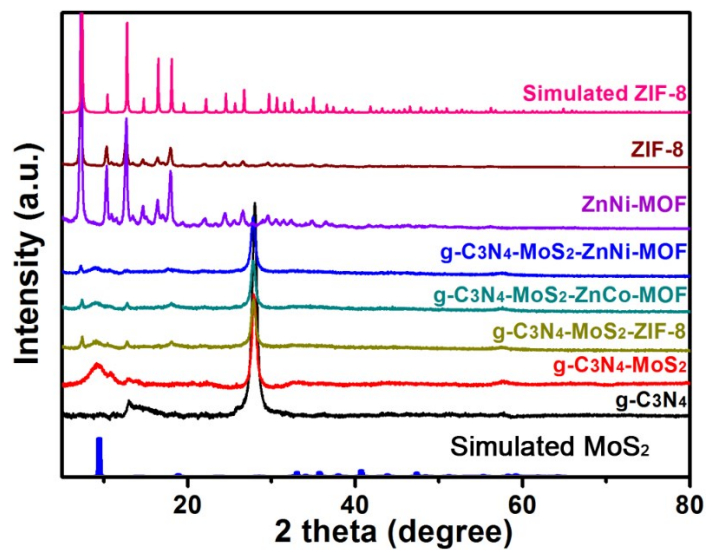

Fig. S1. PXRD patterns of the g-C<sub>3</sub>N<sub>4</sub>-MoS<sub>2</sub>, ZnM-ZIFs and g-C<sub>3</sub>N<sub>4</sub>-MoS<sub>2</sub>-ZnM-ZIFs heterostructures

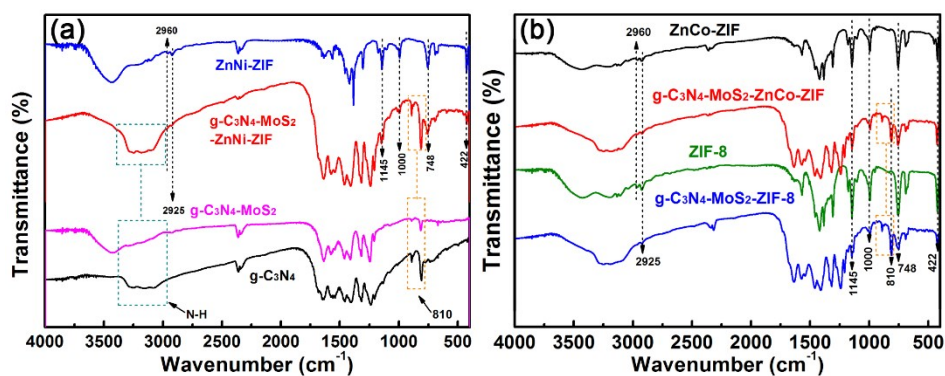

Fig. S2. The (a) FTIR analysis of the ZnNi-ZIF and its heterostructure, (b) ZIF-8, ZnCo-ZIF and their heterostructures.

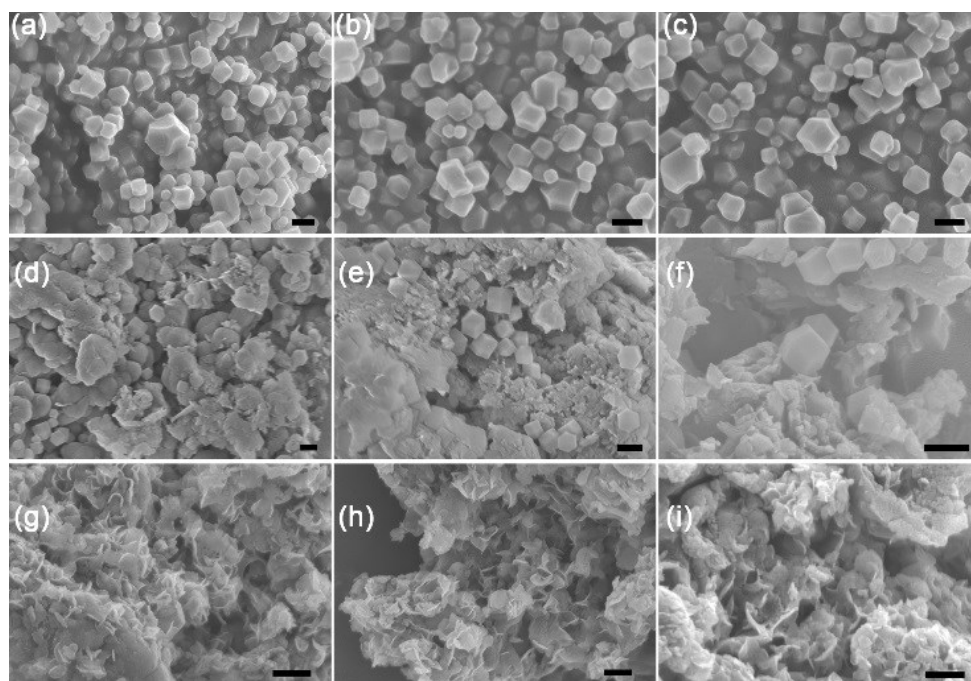

**Fig. S3.** The SEM images (Scale bar of 500 nm) of (a) ZIF-8, (b) ZnCo-ZIF, (c) ZnNi-ZIF, (d) g-C<sub>3</sub>N<sub>4</sub>-ZIF-8, (e) g-C<sub>3</sub>N<sub>4</sub>-ZnCo-ZIF, (f) g-C<sub>3</sub>N<sub>4</sub>-ZnNi-ZIF, (g) g-C<sub>3</sub>N<sub>4</sub>-MoS<sub>2</sub>-ZIF-8, (h) g-C<sub>3</sub>N<sub>4</sub>-MoS<sub>2</sub>-ZnCo-ZIF and (i) g-C<sub>3</sub>N<sub>4</sub>-MoS<sub>2</sub>-ZnNi-ZIF.

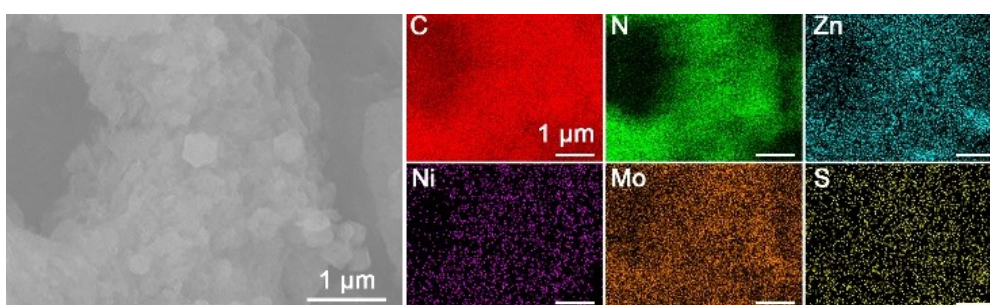

**Fig. S4.** The elemental mapping of the g-C<sub>3</sub>N<sub>4</sub>-MoS<sub>2</sub>-ZnNi-ZIF.

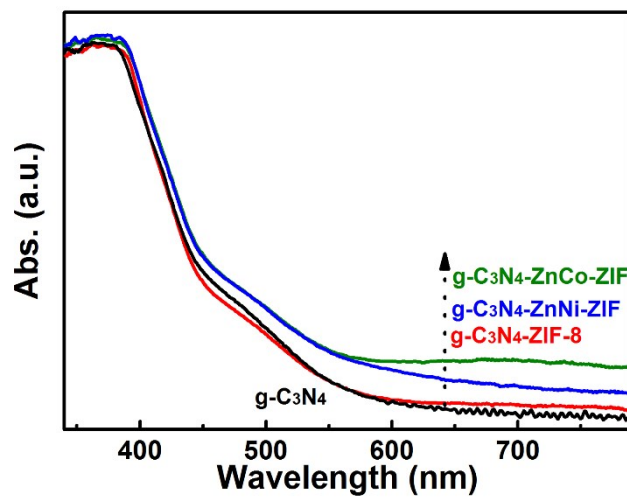

Fig. S5. The UV-vis diffuse reflection spectra of g-C<sub>3</sub>N<sub>4</sub> and g-C<sub>3</sub>N<sub>4</sub>-ZnM-ZIF heterostructures.

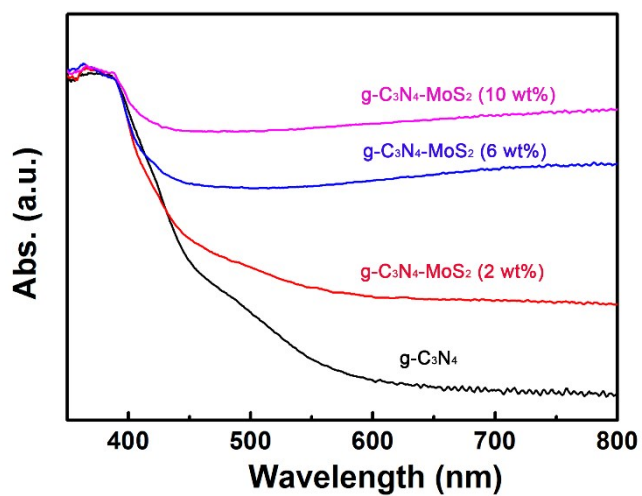

Fig. S6. The UV-vis diffuse reflection spectra of g-C<sub>3</sub>N<sub>4</sub>-MoS<sub>2</sub> heterostructures.

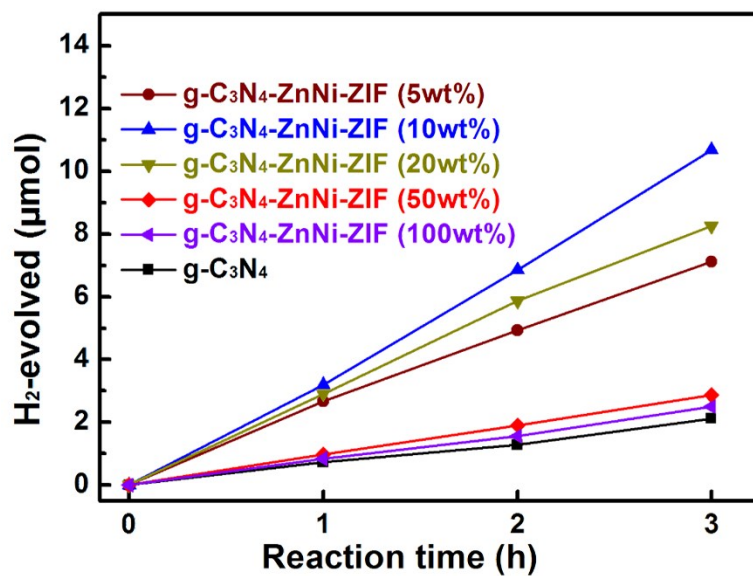

**Fig. S7.** The photocatalytic H<sub>2</sub>-production activities of g-C<sub>3</sub>N<sub>4</sub>-ZnNi-ZIF with different content of ZnNi-ZIF UV-visible light irradiation.

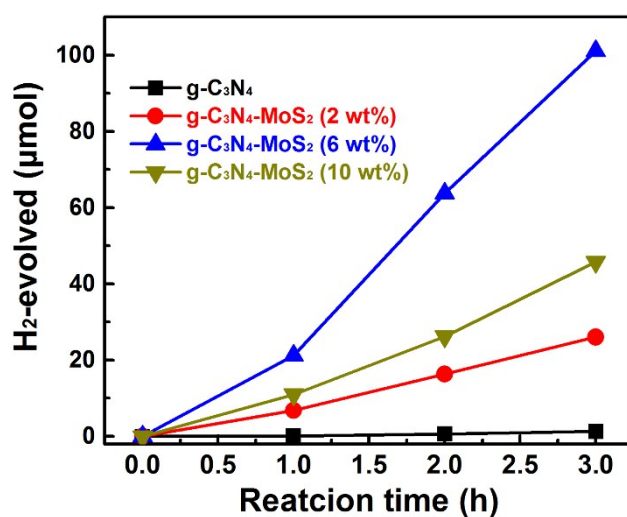

**Fig. S8.** Time dependent of photocatalytic hydrogen production activity of g-C<sub>3</sub>N<sub>4</sub>-MoS<sub>2</sub> heterostructures.

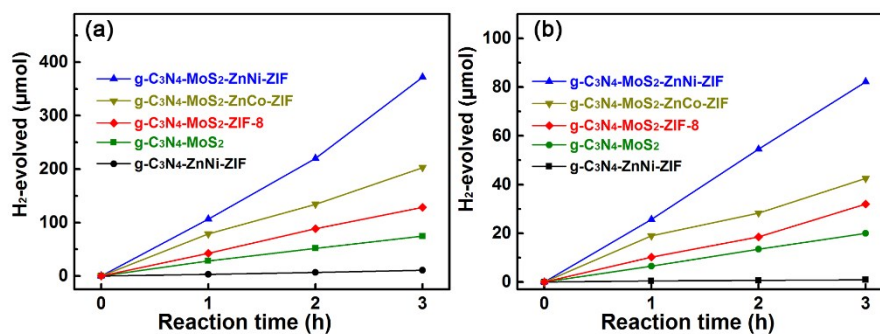

**Fig. S9.** Effect of the adoption of MoS<sub>2</sub> and g-C<sub>3</sub>N<sub>4</sub> on the photocatalytic activity of ZnM-ZIFs under (a) UV-visible and (b) visible light irradiation.

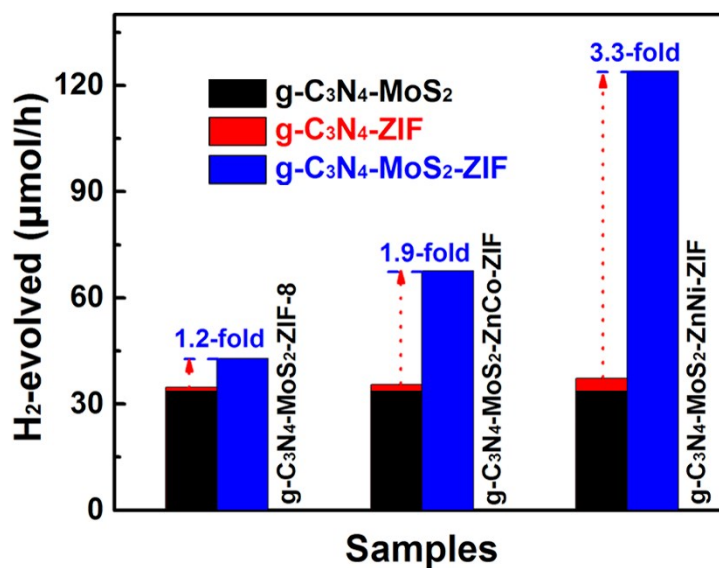

**Fig. S10.** The comparison results sum photocatalytic activity of g-C<sub>3</sub>N<sub>4</sub>-ZIFs and g-C<sub>3</sub>N<sub>4</sub>-MoS<sub>2</sub> with that of ternary g-C<sub>3</sub>N<sub>4</sub>-MoS<sub>2</sub>-ZnM-ZIFs under UV-vis light irradiation.

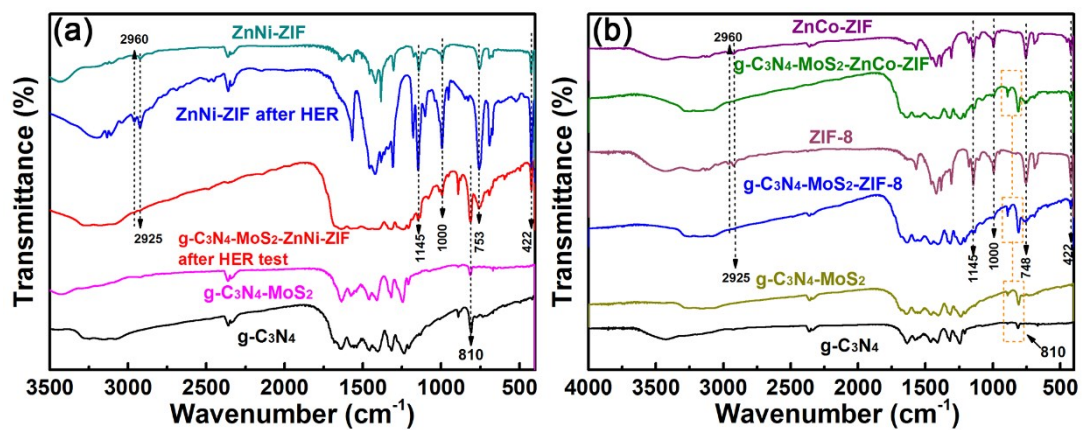

**Fig. S11.** The FTIR analysis of the (a) ZnNi-ZIF-based and (b) ZIF-8 as well as ZnCo-ZIF-based heterostructures after the photocatalytic hydrogen production reaction.

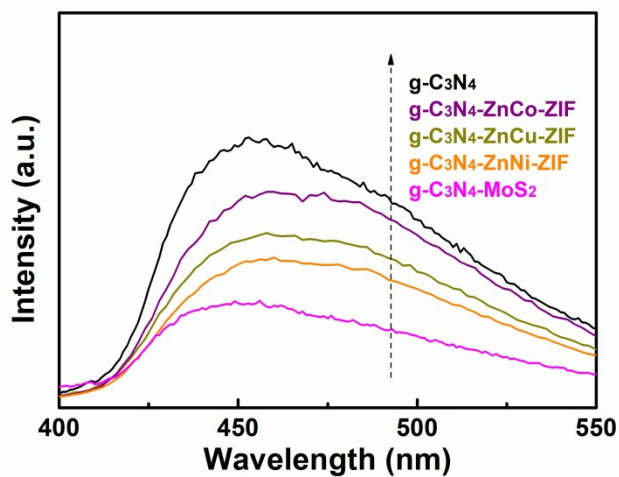

**Fig. S12.** The room temperature photoluminescence (PL) spectra of g-C<sub>3</sub>N<sub>4</sub>, g-C<sub>3</sub>N<sub>4</sub>-MoS<sub>2</sub> and g-C<sub>3</sub>N<sub>4</sub>-ZnM-ZIF heterostructures.



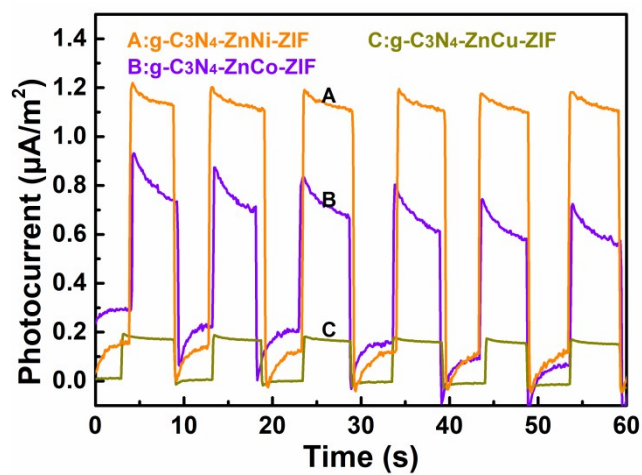

**Fig. S13.** The transient photocurrent responses of  $g\text{-C}_3\text{N}_4$  and  $g\text{-C}_3\text{N}_4\text{-ZnM-ZIF}$  heterostructures.

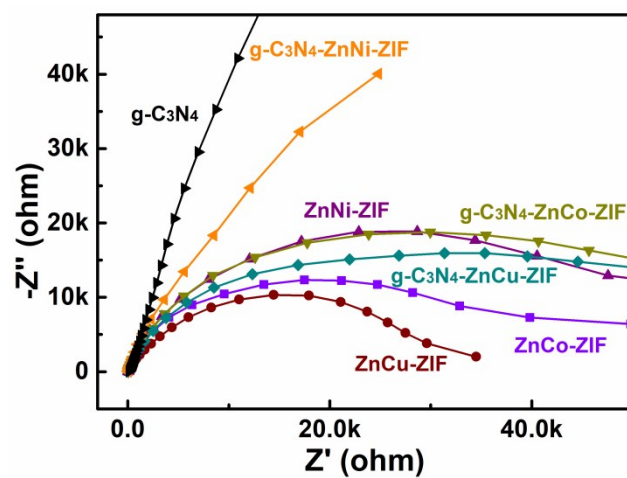

**Fig. S14.** The electrochemical impedance spectroscopy (EIS) spectra of  $g\text{-C}_3\text{N}_4$ , ZnM-ZIF, and  $g\text{-C}_3\text{N}_4\text{-ZnM-ZIF}$  heterostructures.



## 5. Supporting Table

**Table S1.** Calculated apparent quantum efficiency (AQE) of g-C<sub>3</sub>N<sub>4</sub>-MoS<sub>2</sub>-ZnNi-ZIF at different wavelengths.

| Wavelength (nm) | H <sub>2</sub> Evolved (μmol) | Light Intensity (mW) | AQEs (%) |
|-----------------|-------------------------------|----------------------|----------|
| 420             | 18.18                         | 13.1                 | 22.0     |
| 475             | 9.22                          | 18.4                 | 7.9      |
| 550             | 2.76                          | 20.3                 | 1.6      |
| 650             | 1.42                          | 16.5                 | 0.9      |

$\lambda=420$  nm

$$N = \frac{E\lambda}{hc} = \frac{13.1 \times 10^{-3} \times 3600 \times 420 \times 10^{-9}}{6.626 \times 10^{-34} \times 3 \times 10^8} = 9.96 \times 10^{19}$$

$$AQE = \frac{\text{the number of reacted electrons}}{\text{the number of incident photons}} \times 100\%$$

$$= \frac{2 \times \text{the number of evolved H}_2 \text{ molecules}}{N} \times 100\%$$

$$= \frac{2 \times 6.02 \times 10^{23} \times 18.18 \times 10^{-6}}{9.96 \times 10^{19}} = 22.0\%$$

$\lambda=475$  nm

$$N = \frac{E\lambda}{hc} = \frac{18.4 \times 10^{-3} \times 3600 \times 475 \times 10^{-9}}{6.626 \times 10^{-34} \times 3 \times 10^8} = 1.58 \times 10^{20}$$

$$AQE = \frac{\text{the number of reacted electrons}}{\text{the number of incident photons}} \times 100\%$$

$$= \frac{2 \times \text{the number of evolved H}_2 \text{ molecules}}{N} \times 100\%$$

$$= \frac{2 \times 6.02 \times 10^{23} \times 9.22 \times 10^{-6}}{1.58 \times 10^{20}} = 7.9\%$$

$\lambda=550$  nm

$$N = \frac{E\lambda}{hc} = \frac{20.3 \times 10^{-3} \times 3600 \times 550 \times 10^{-9}}{6.626 \times 10^{-34} \times 3 \times 10^8} = 2.02 \times 10^{20}$$

$$AQE = \frac{\text{the number of reacted electrons}}{\text{the number of incident photons}} \times 100\%$$

$$= \frac{2 \times \text{the number of evolved } H_2 \text{ molecules}}{N} \times 100\%$$

$$= \frac{2 \times 6.02 \times 10^{23} \times 2.76 \times 10^{-6}}{2.02 \times 10^{20}} = 1.6\%$$

$$\lambda = 650 \text{ nm}$$

$$N = \frac{E\lambda}{hc} = \frac{16.5 \times 10^{-3} \times 3600 \times 650 \times 10^{-9}}{6.626 \times 10^{-34} \times 3 \times 10^8} = 1.94 \times 10^{20}$$

$$AQE = \frac{\text{the number of reacted electrons}}{\text{the number of incident photons}} \times 100\%$$

$$= \frac{2 \times \text{the number of evolved } H_2 \text{ molecules}}{N} \times 100\%$$

$$= \frac{2 \times 6.02 \times 10^{23} \times 1.42 \times 10^{-6}}{1.94 \times 10^{20}} = 0.9\%$$
